# Supplementary material for: A Ratiometric Fluorescence Probe of Dopamine-Functionalized Carbon Nanodots for Hypochlorite Detection
Source: MDPI journal article supplement (doi:10.3390/chemosensors10100383), 2022-09-22
Supplement: s1 [file s1]

Supplementary Materials

# A Ratiometric Fluorescence Probe of Dopamine-Functionalized Carbon Nanodots for Hypochlorite Detection

Wenjing Qi \*, Lei Chen, Chengpei Du and Yi Wang

Chongqing Key Laboratory of Inorganic Functional Materials, College of Chemistry,  
Chongqing Normal University, Chongqing 401331, China

\* Correspondence: wenjingqi616@cqu.edu.cn; Tel.: +86-23-65362777

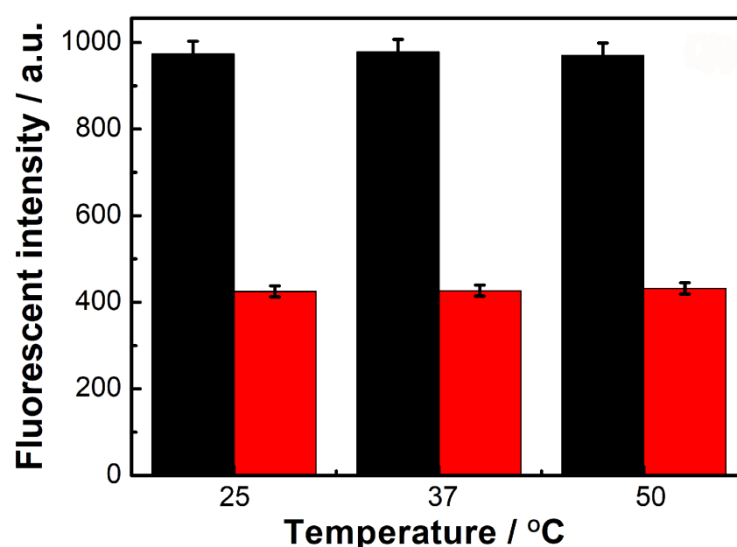

**Figure S1.** The effect of temperature on the detection of  $\text{ClO}^-$ . Black columns represent the fluorescence intensity of the fluorescent probe; red columns represent the fluorescence intensity of the mixed solution after adding  $\text{ClO}^-$ .  $c(\text{probe}, \mu\text{L})$ : 20;  $c(\text{ClO}^-, \mu\text{M})$ : 50; 40 mM phosphate buffer solution; pH 8.0.  $\lambda_{\text{ex}}$ : 285 nm;  $\lambda_{\text{em}}$ : 460 nm; All the error bars represent the standard deviation of three measurements.

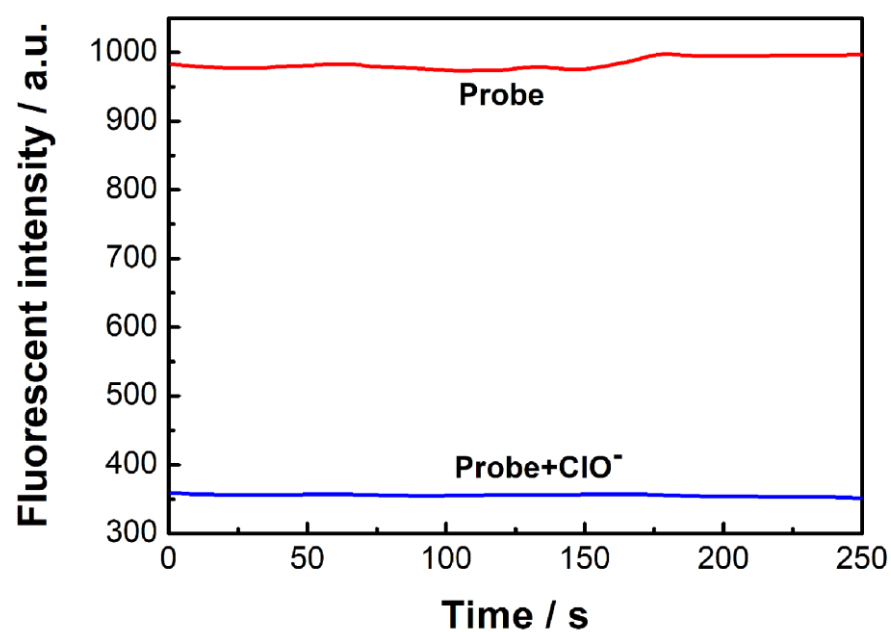

**Figure S2.** Kinetic behavior of  $\text{ClO}^-$  detection. The reaction time between the probe and  $\text{ClO}^-$  (s): 0–250; temperature ( $^{\circ}\text{C}$ ): 25 (room temperature);  $c(\text{probe}, \mu\text{L})$ : 20;  $c(\text{ClO}^-, \mu\text{M})$ : 50; 40 mM phosphate buffer solution: pH 8.0.  $\lambda_{\text{ex}}$ : 285 nm;  $\lambda_{\text{em}}$ : 460 nm; The red line represents the fluorescence intensity value of the probe; the blue line represents the fluorescence intensity value of the mixed solution after adding  $\text{ClO}^-$ .
